# Supplementary material for: Rechargeable Mg–Na and Mg–K hybrid batteries based on a low-defect Co3[Co(CN)6]2 nanocube cathode
Source: Royal Society of Chemistry journal article supplement (doi:10.1039/d1cp02789a), 2021-01-01
Supplement: d1cp02789a1.pdf [file d1cp02789a1.pdf]

## Electronic Supplementary Information

### Rechargeable Mg-Na and Mg-K hybrid batteries based on low-defect $\text{Co}_3[\text{Co}(\text{CN})_6]_2$ nanocube cathode

Dong Chen<sup>a</sup>, Zhongxue Chen<sup>a,\*</sup>, Fei Xu<sup>a,\*</sup>

<sup>a</sup> Key Laboratory of Hydraulic Machinery Transients, Ministry of Education, School of Power and Mechanical Engineering, Wuhan University, Wuhan 430072, China.

\* Corresponding authors.

E-mail addresses:

zxchen\_pmc@whu.edu.cn (Z. Chen)

xufei2058@whu.edu.cn (F. Xu)

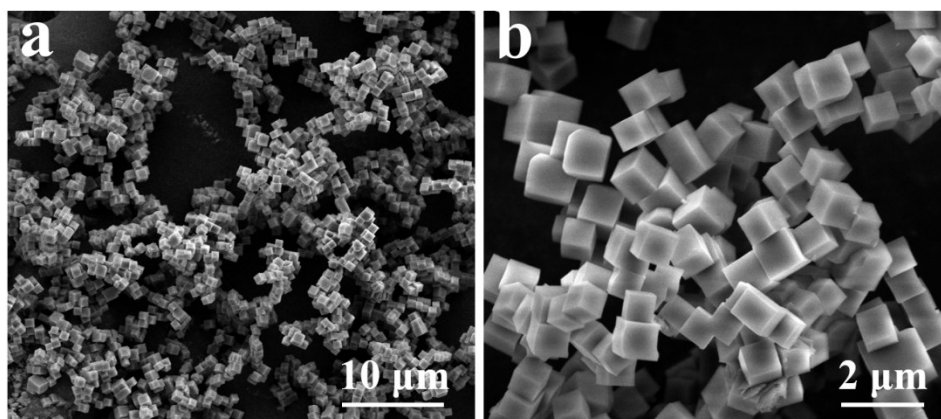

**Fig. S1** SEM images of L-CoCoCN.

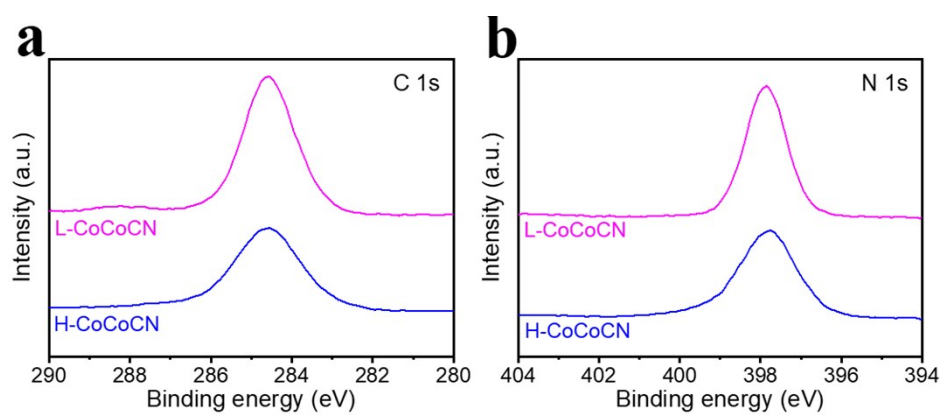

**Fig. S2** High-resolution XPS spectra of (a) C 1s and (b) N 1s for L-CoCoCN and H-CoCoCN.

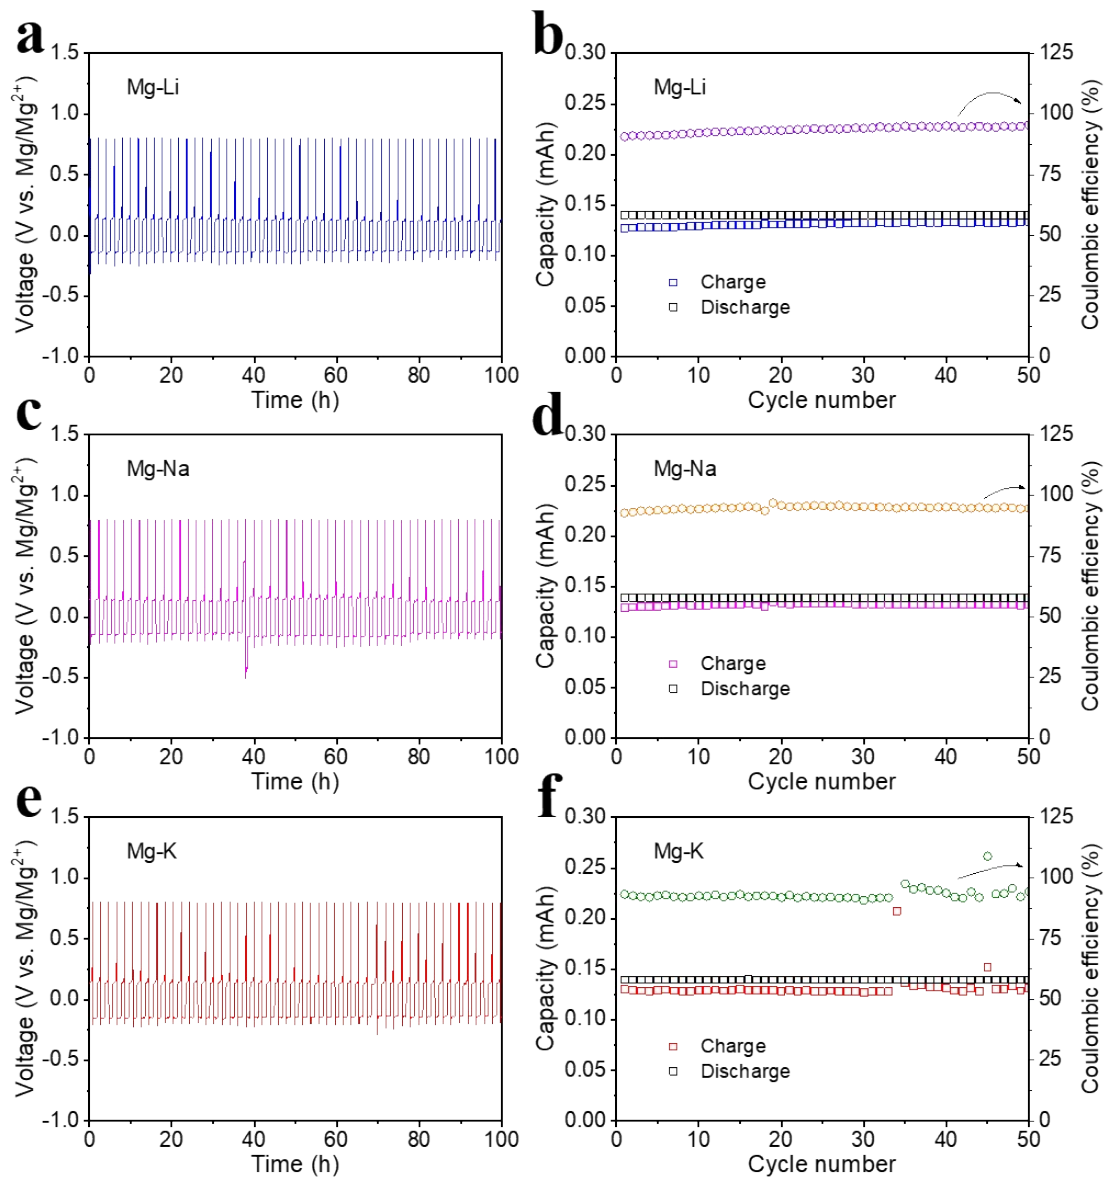

**Fig. S3** Galvanostatic chronopotentiograms of Mg deposition/dissolution in (a,b) Mg<sup>2+</sup>/Li<sup>+</sup>, (c,d) Mg<sup>2+</sup>/Na<sup>+</sup> and (e,f) Mg<sup>2+</sup>/K<sup>+</sup> dual-ion electrolytes.

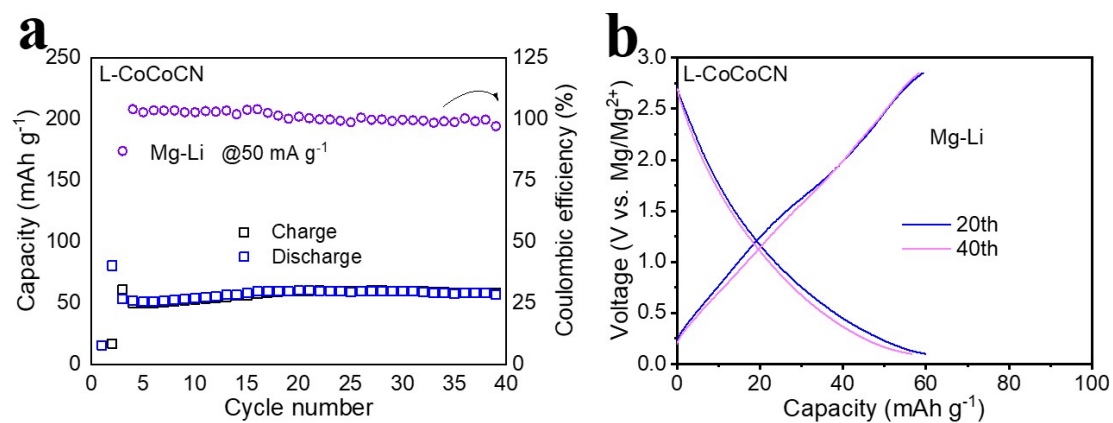

**Fig. S4** (a) Discharge/charge profiles and (b) Cycling performance of L-CoCoCN Mg-Li cell at 50 mA g<sup>-1</sup>.

**Table S1.** Elements mass percentage of L-CoCoCN and H-CoCoCN determined by EA measurements and calculation.

| Sample   | EA      |          |          | Calculation |          |
|----------|---------|----------|----------|-------------|----------|
|          | H       | C        | N        | O           | Co       |
| L-CoCoCN | 2.5 wt% | 18.3 wt% | 20.9 wt% | 20.0 wt%    | 38.3 wt% |
| H-CoCoCN | 3.2 wt% | 17.2 wt% | 18.2 wt% | 25.6 wt%    | 35.8 wt% |
